# Supplementary material
Source: PubMed Central journal article supplement (PMC3806652)
Supplement: NIHMS511031-supplement-1_si_001.pdf [file NIHMS511031-supplement-1_si_001.pdf]

# The Polarizable Atomic Multipole-based AMOEBA Force Field for Proteins

Yue Shi<sup>1+</sup>, Zhen Xia<sup>1+</sup>, Jiajing Zhang<sup>1</sup>, Robert Best<sup>2</sup>, Chuanjie Wu<sup>3</sup>, Jay W. Ponder<sup>3</sup>, and Pengyu Ren<sup>1\*</sup>

<sup>1</sup>*Department of Biomedical Engineering, The University of Texas at Austin, Austin, TX 78712*

<sup>2</sup>*Laboratory of Chemical Physics, NIDDK, National Institute of Health, Bethesda, MD 20892*

<sup>3</sup>*Department of Chemistry, Washington University School of Medicine, St. Louis, MO 63110*

\* Corresponding Author: [pren@mail.utexas.edu](mailto:pren@mail.utexas.edu)

<sup>+</sup> These authors contributed equally.

Table S1. Electrostatic dipole moments for individual amino acids. The permanent atomic multipoles (PAMs) were derived from the specified model compounds. Dipeptide molecular dipole moments of the conformations from the validation set are listed here. The corresponding  $\phi$  and  $\psi$  angles can be found in Table S2.

| <b>Dipeptide Dipole Moments (debye)</b>        |                      |                      |                      |                          |
|------------------------------------------------|----------------------|----------------------|----------------------|--------------------------|
| <b>AMOEBA vs MP2/aug-cc-pVTZ (parenthesis)</b> |                      |                      |                      |                          |
|                                                | <b>D<sub>x</sub></b> | <b>D<sub>y</sub></b> | <b>D<sub>z</sub></b> | <b>D<sub>total</sub></b> |
| Cys                                            | -1.32(-1.30)         | -2.28(-2.21)         | 0.33(0.31)           | 2.66(2.59)               |
|                                                | 2.63(2.70)           | -0.94(-0.81)         | 1.28(1.41)           | 3.07(3.15)               |
|                                                | -3.27(-3.18)         | -1.16(-1.11)         | 0.12(0.14)           | 3.47(3.37)               |
| Met                                            | 1.59(1.64)           | -1.61(-1.72)         | 2.04(1.82)           | 3.05(3.00)               |
|                                                | -1.72(-1.68)         | -2.76(-2.76)         | -0.31(-0.41)         | 3.27(3.27)               |
|                                                | 2.25(2.18)           | -0.71(-0.57)         | 1.31(1.43)           | 2.70(2.66)               |
| Ser                                            | -3.47 (-3.45)        | 0.31 (0.37)          | -2.06 (-2.09)        | 4.05(4.05)               |
|                                                | -4.47(-4.31)         | -2.07(-1.90)         | -2.42(-2.44)         | 5.49(5.30)               |
|                                                | 2.75(2.97)           | -1.98(-1.85)         | -0.56(-0.49)         | 3.43(3.54)               |
| Thr                                            | -0.11(-0.12)         | 1.81(1.63)           | -0.24(-0.17)         | 1.83(1.65)               |
|                                                | 1.68(1.58)           | 0.02(0.26)           | 0.19(0.20)           | 1.69(1.62)               |
|                                                | 1.79(1.73)           | 0.14(0.41)           | 0.30(0.35)           | 1.82(1.82)               |
| His                                            | 8.57(8.50)           | -4.62(-4.96)         | -0.32(-0.39)         | 9.74(9.85)               |
|                                                | 11.94(11.18)         | -4.70(-4.58)         | -4.40(-3.89)         | 13.56(12.69)             |
|                                                | 5.34(5.44)           | 0.89(0.63)           | -1.36(-1.23)         | 5.59(5.62)               |
| Hid                                            | -4.34(-4.37)         | -4.21(-4.27)         | -0.13(-0.19)         | 6.04(6.11)               |
|                                                | 5.61(5.59)           | -0.22(0.01)          | 1.43(1.47)           | 5.80(5.78)               |
|                                                | 3.44(3.18)           | 0.05(-0.13)          | 0.27(0.11)           | 3.45(3.19)               |
| Hie                                            | -2.59(-2.91)         | 5.36(5.20)           | -2.54(2.47)          | 6.47(6.45)               |
|                                                | 7.37(7.55)           | -3.69(-3.74)         | -0.05(-0.06)         | 8.24(8.43)               |
|                                                | -1.63(-1.84)         | 0.51(0.43)           | -3.60(-3.62)         | 3.98(4.08)               |
| Leu                                            | -0.71(-0.76)         | 2.32(2.23)           | -0.85(-0.97)         | 2.58(2.55)               |
|                                                | 2.09(2.42)           | -1.69(-1.62)         | -0.07(-0.09)         | 2.68(2.92)               |
|                                                | 0.86(0.84)           | -1.66(-1.65)         | 0.33(0.43)           | 1.90(1.90)               |
| Ile                                            | 2.71(2.86)           | -0.23(-0.23)         | -0.25(-0.25)         | 2.73(2.88)               |
|                                                | -1.18(-1.20)         | -1.56(-1.47)         | -0.20(-0.29)         | 1.96(1.92)               |
|                                                | -0.15(-0.06)         | -2.45(-2.44)         | -1.41(-1.48)         | 2.84(2.85)               |
| Val                                            | -1.05(-0.92)         | -1.74(-1.67)         | -0.48(-0.70)         | 2.09(2.03)               |
|                                                | 1.11(1.00)           | -1.57(-1.60)         | 0.43(0.55)           | 1.97(1.96)               |
|                                                | 1.02(1.22)           | -3.48(-3.62)         | 4.53(4.45)           | 5.80(5.89)               |
| Phe                                            | 2.32(2.61)           | 2.21(2.05)           | 1.37(1.44)           | 3.49(3.61)               |
|                                                | -0.44(-0.38)         | 2.38(2.26)           | -0.60(-0.75)         | 2.49(2.41)               |
|                                                | 1.06(0.99)           | 2.22(2.04)           | 1.15(1.24)           | 2.73(2.58)               |

|      |                |              |              |              |
|------|----------------|--------------|--------------|--------------|
| Tyr  | -1.14(-1.08)   | 0.07(0.04)   | -1.83(-1.71) | 2.16(2.02)   |
|      | -0.93(-1.22)   | 1.24(1.06)   | -1.42(1.46)  | 2.10(2.18)   |
|      | -2.50(-2.73)   | 2.19(2.21)   | 0.68(0.81)   | 3.40(3.61)   |
| Trp  | -5.66(-5.98)   | -0.87(-0.95) | -3.00(2.98)  | 6.47(6.75)   |
|      | 3.60(3.72)     | 1.12(1.27)   | 2.29(2.23)   | 4.42(4.52)   |
|      | -2.08(-2.21)   | -0.01(-0.22) | -2.07(-2.09) | 2.93(3.05)   |
| Arg  | -11.23(-11.13) | -2.14(-1.98) | 2.88(2.88)   | 11.79(11.67) |
|      | 7.45(7.56)     | 3.34(2.80)   | -1.58(-1.21) | 8.32(8.16)   |
|      | 11.76(11.45)   | -3.00(-2.96) | -3.07(-2.97) | 12.51(12.19) |
| Asp  | 4.19(4.46)     | 0.25(0.40)   | 1.46(1.74)   | 4.44(4.80)   |
|      | -4.64(-4.82)   | -7.61(-8.16) | 1.65(1.54)   | 9.06(9.60)   |
|      | -10.96(-11.37) | 1.34(1.31)   | -6.27(-6.30) | 12.70(12.70) |
| Asph | 3.33(3.45)     | -6.24(-5.56) | 0.10(-0.23)  | 7.08(6.55)   |
|      | -5.98(-5.60)   | -1.88(-2.38) | -2.76(-3.02) | 6.85(6.79)   |
|      | 5.12(4.65)     | 3.00(2.87)   | -6.47(-6.50) | 8.78(8.49)   |
| Asn  | -0.58(-0.47)   | 0.07(-0.04)  | 2.74(2.39)   | 2.80(2.44)   |
|      | -3.63(-3.85)   | -0.57(-0.64) | -2.59(2.51)  | 4.50(4.64)   |
|      | -1.70(-1.98)   | 0.19(-0.02)  | -6.99(-6.79) | 7.20(7.07)   |
| Glu  | -5.00(-4.69)   | -0.22(-0.46) | 0.04(0.29)   | 5.00(4.72)   |
|      | 15.69(16.07)   | -0.89(-1.01) | 3.25(3.27)   | 16.04(16.43) |
|      | 15.08(15.24)   | -0.47(-0.54) | 0.62(0.47)   | 15.10(15.26) |
| Gln  | 2.71(2.74)     | -0.36(-0.50) | -4.61(-4.47) | 5.36(5.27)   |
|      | -4.46(-4.72)   | -1.21(-1.35) | -5.14(-4.84) | 6.91(6.90)   |
|      | -0.93(-1.02)   | 3.69(3.80)   | 2.91(2.84)   | 4.79(4.85)   |
| Lys  | -11.54(-11.20) | 0.25(0.07)   | 2.93(2.86)   | 11.91(11.56) |
|      | 17.19(17.24)   | 0.83(1.00)   | 1.12(1.11)   | 17.24(17.31) |
|      | 13.40(13.46)   | 0.90(0.97)   | -3.01(-2.99) | 13.76(13.82) |

Table S2. The RMSE (kcal/mol per charge unit) between AMOEBA and *ab initio* (MP2/aug-cc-pVTZ) electrostatic potentials. The RMSE values for all conformers of each model compound are listed.

|     |        | Parameterization set |           |         |        |        | Validation set |
|-----|--------|----------------------|-----------|---------|--------|--------|----------------|
|     |        | $\alpha_L$           | $\alpha'$ | C5      | C7a    | C7e    | $\beta_2$      |
| Ala | $\phi$ | 63.50                | -166.10   | -158.40 | 73.90  | -82.90 | -137.90        |
|     | $\psi$ | 34.80                | -37.20    | 161.30  | -64.00 | 77.90  | 22.90          |
|     | RMSE   | 0.40                 | 0.43      | 0.35    | 0.28   | 0.32   | 0.46           |

  

|     |        | Parameterization set |  | Validation set |  |
|-----|--------|----------------------|--|----------------|--|
| Pro | $\phi$ | 40.00                |  | -85.70         |  |
|     | $\psi$ | 55.00                |  | 74.00          |  |
|     | RMSE   | 0.27                 |  | 0.29           |  |

  

|     |        | Parameterization set |        | Validation set |  |
|-----|--------|----------------------|--------|----------------|--|
| Gly | $\phi$ | -83.00               | 172.30 | -90.00         |  |
|     | $\psi$ | 74.70                | 177.00 | 180.00         |  |
|     | RMSE   | 0.14                 | 0.16   | 0.18           |  |

  

| RMSE | Ala-NH <sub>3</sub> | Ala-COOH | Ala-COO | Ala-NH <sub>2</sub> | Gly-NH <sub>3</sub> | Gly-COOH |
|------|---------------------|----------|---------|---------------------|---------------------|----------|
|      | 0.39                | 0.39     | 0.57    | 0.58                | 0.22                | 0.58     |

  

|     |        | Parameterization set |         |         |         | Validation set |         |
|-----|--------|----------------------|---------|---------|---------|----------------|---------|
| Cys | $\phi$ | -140.41              | -140.41 | -87.24  | -87.24  | -87.24         | -140.41 |
|     | $\psi$ | 159.78               | 159.78  | 81.12   | 81.12   | 81.12          | 159.78  |
|     | $\chi$ | 0.00                 | 150.00  | -30.00  | 60.00   | -150.00        | -90.00  |
|     | RMSE   | 0.28                 | 0.27    | 0.32    | 0.32    | 0.40           | 0.38    |
| Met | $\phi$ | -75.12               | -93.37  | -131.24 | -82.28  | -85.25         | -82.28  |
|     | $\psi$ | -26.89               | 0.52    | 18.04   | 79.49   | 64.39          | 79.49   |
|     | $\chi$ | -175.10              | -72.90  | -62.50  | -170.80 | -150.00        | -170.00 |
|     | RMSE   | 0.43                 | 0.41    | 0.36    | 0.40    | 0.33           | 0.32    |
| Ser | $\phi$ | -76.13               | -156.36 | -84.63  | -84.62  | 75.44          | -173.55 |
|     | $\psi$ | -20.69               | -171.94 | 66.55   | 66.56   | -37.77         | 168.89  |
|     | $\chi$ | -51.40               | -168.30 | 179.90  | 179.00  | 84.40          | -92.80  |
|     | RMSE   | 0.80                 | 0.61    | 0.59    | 0.59    | 0.41           | 0.67    |
| Thr | $\phi$ | -82.40               | -70.71  | -101.99 | -82.39  | -154.91        | -155.67 |

|     |        |         |         |         |         |         |         |
|-----|--------|---------|---------|---------|---------|---------|---------|
|     | $\psi$ | 78.05   | -30.42  | 137.96  | 78.04   | -178.26 | -177.30 |
|     | $\chi$ | -66.20  | -170.60 | -175.80 | -66.20  | 71.70   | 69.20   |
|     | RMSE   | 0.41    | 0.48    | 0.52    | 0.41    | 0.46    | 0.47    |
| His | $\phi$ | -158.24 | -124.68 | 51.48   | -140.00 | -60.00  | -161.76 |
|     | $\psi$ | 27.69   | 136.26  | 48.61   | 135.00  | -45.00  | 37.48   |
|     | $\chi$ | 156.20  | -59.90  | -62.50  | -60.00  | 60.00   | -117.74 |
|     | RMSE   | 0.64    | 0.55    | 0.49    | 0.55    | 1.19    | 0.47    |
| Hid | $\phi$ | -79.05  | -119.62 | -83.85  | -83.85  | -83.85  | -83.85  |
|     | $\psi$ | -18.18  | 17.74   | 73.71   | 73.71   | 73.71   | 73.71   |
|     | $\chi$ | -169.00 | -89.00  | 170.00  | 171.62  | 31.53   | -172.00 |
|     | RMSE   | 0.57    | 0.42    | 0.34    | 0.34    | 0.44    | 0.59    |
| Hie | $\phi$ | -68.05  | -80.38  | -156.70 | -83.49  | -156.70 | -83.49  |
|     | $\psi$ | -35.58  | -17.06  | -156.10 | 51.82   | -156.10 | 51.82   |
|     | $\chi$ | -172.92 | -59.12  | 150.00  | 54.80   | 69.10   | 54.80   |
|     | RMSE   | 0.54    | 0.57    | 0.50    | 0.53    | 0.51    | 0.40    |
| Leu | $\phi$ | -124.77 | -72.96  | -82.47  | -83.81  | -155.58 | -81.06  |
|     | $\psi$ | 15.28   | -30.83  | 83.56   | 79.25   | 143.66  | 85.83   |
|     | $\chi$ | -59.30  | 179.0   | -177.70 | -55.40  | 120.0   | -178.1  |
|     | RMSE   | 0.32    | 0.42    | 0.29    | 0.35    | 0.48    | 0.32    |
| Ile | $\phi$ | -72.10  | -130.00 | -84.13  | -151.81 | -82.19  | -84.86  |
|     | $\psi$ | -35.05  | 132.96  | 68.47   | 156.22  | 83.40   | 59.73   |
|     | $\chi$ | -69.90  | -58.90  | 52.30   | -168.20 | 179.20  | 54.30   |
|     | RMSE   | 0.36    | 0.38    | 0.30    | 0.29    | 0.32    | 0.33    |
| Val | $\phi$ | -71.27  | -131.52 | -132.55 | -85.60  | -85.60  | -77.60  |
|     | $\psi$ | -34.77  | 134.41  | 165.37  | 88.90   | 88.90   | -32.20  |
|     | $\chi$ | -65.90  | -57.40  | 63.60   | -120.00 | -180.00 | 150.00  |
|     | RMSE   | 0.41    | 0.34    | 0.28    | 0.46    | 0.48    | 0.51    |
| Phe | $\phi$ | -67.20  | -159.33 | -78.56  | -80.60  | -84.17  | -87.05  |
|     | $\psi$ | -38.86  | 173.79  | -19.59  | 41.63   | 76.28   | 74.43   |
|     | $\chi$ | 178.90  | 120.00  | -57.00  | 0.00    | -77.20  | -66.20  |
|     | RMSE   | 0.49    | 0.31    | 0.48    | 0.51    | 0.42    | 0.36    |
| Tyr | $\phi$ | -66.82  | -78.61  | -161.31 | 70.56   | -83.84  | -161.38 |
|     | $\psi$ | -39.10  | -19.71  | 151.48  | 38.42   | 53.64   | 151.48  |
|     | $\chi$ | -79.40  | -57.10  | 178.30  | -62.60  | 44.00   | -178.20 |
|     | RMSE   | 0.51    | 0.46    | 0.34    | 0.65    | 0.46    | 0.38    |
| Trp | $\phi$ | -69.06  | -78.43  | -83.98  | -60.00  | -60.00  | -140.00 |
|     | $\psi$ | -37.71  | -19.89  | 54.64   | -45.00  | -45.00  | 135.00  |
|     | $\chi$ | 174.90  | -55.40  | 49.30   | 60.00   | -90.00  | -179.40 |
|     | RMSE   | 0.55    | 0.49    | 0.49    | 0.54    | 0.49    | 0.53    |
| Arg | $\phi$ | -148.86 | -77.57  | -85.33  | -77.57  | -85.33  | -157.03 |
|     | $\psi$ | 37.42   | -20.65  | 68.93   | -20.65  | 68.93   | 35.71   |
|     | $\chi$ | -60.80  | 173.10  | 61.40   | 173.10  | 60.00   | -152.50 |

|      |        |         |         |         |         |         |         |
|------|--------|---------|---------|---------|---------|---------|---------|
|      | RMSE   | 0.56    | 0.63    | 0.66    | 0.63    | 0.66    | 1.09    |
| Asp  | $\phi$ | -70.55  | -84.50  | -155.44 | -60.00  | -140.00 | -60.00  |
|      | $\psi$ | -30.13  | -24.50  | 171.95  | -45.00  | 135.00  | -45.00  |
|      | $\chi$ | -51.75  | -162.42 | -166.14 | 60.00   | -160.00 | -177.58 |
|      | RMSE   | 0.52    | 0.59    | 0.73    | 0.58    | 0.80    | 0.49    |
| Asph | $\phi$ | -144.60 | -79.22  | -83.38  | -140.00 | -60.00  | -60.00  |
|      | $\psi$ | 24.86   | -17.20  | 73.60   | 135.00  | -45.00  | -45.00  |
|      | $\chi$ | -56.80  | -58.90  | -174.40 | 60.00   | 150.00  | -90.00  |
|      | RMSE   | 0.43    | 0.49    | 0.40    | 1.08    | 1.15    | 0.92    |
| Asn  | $\phi$ | -79.61  | -84.03  | -83.95  | -140.00 | -60.03  | -60.00  |
|      | $\psi$ | -16.43  | 59.40   | 57.60   | 135.00  | -44.29  | -45.00  |
|      | $\chi$ | -59.10  | -50.90  | 51.50   | -174.80 | -53.10  | -45.00  |
|      | RMSE   | 0.53    | 0.43    | 0.43    | 0.76    | 0.53    | 0.66    |
| Glu  | $\phi$ | -88.43  | -93.86  | -67.30  | -60.00  | -60.00  | -140.00 |
|      | $\psi$ | -15.44  | -4.90   | -38.92  | -45.00  | -45.00  | 135.00  |
|      | $\chi$ | -57.38  | 80.59   | -179.44 | 60.00   | -177.70 | -90.00  |
|      | RMSE   | 0.65    | 0.76    | 0.49    | 0.95    | 0.57    | 0.62    |
| Gln  | $\phi$ | -130.02 | -157.43 | -75.02  | -60.00  | -60.00  | -140.00 |
|      | $\psi$ | 16.19   | 175.05  | -26.26  | -45.00  | -45.00  | 135.00  |
|      | $\chi$ | -65.77  | -104.15 | -173.82 | 60.00   | 176.50  | 120.00  |
|      | RMSE   | 0.41    | 0.45    | 0.65    | 0.56    | 0.75    | 0.50    |
| Lys  | $\phi$ | -148.74 | -84.82  | -152.99 | -83.23  | -157.41 | -83.73  |
|      | $\psi$ | 35.58   | 74.53   | 25.53   | 61.15   | 34.54   | 76.51   |
|      | $\chi$ | -166.93 | -161.43 | -149.24 | -65.39  | -163.91 | -165.80 |
|      | RMSE   | 0.59    | 0.67    | 0.45    | 0.72    | 0.54    | 0.50    |

Table S3. HA-CA-CB-HB *J*-Coupling data (Hz) for BPTI.

| Residue index | Dihedral angle           | <i>J</i> -expt. | <i>J</i> -calc. |
|---------------|--------------------------|-----------------|-----------------|
| PHE-4         | 4_HA_4_CA_4_CB_4_2HB     | 4.5             | 4.04            |
| PHE-4         | 4_HA_4_CA_4_CB_4_HB3     | 4.5             | 3.81            |
| CYS-5         | 5_HA_5_CA_5_CB_5_HB3     | 3.0             | 2.86            |
| CYS-5         | 5_HA_5_CA_5_CB_5_2HB     | 12.0            | 10.09           |
| THR-11        | 11_HA_11_CA_11_CB_11_HB  | 8.2             | 9.17            |
| CYS-14        | 14_HA_14_CA_14_CB_14_HB3 | 3.0             | 2.34            |
| CYS-14        | 14_HA_14_CA_14_CB_14_2HB | 12.0            | 10.09           |
| LYS-15        | 15_HA_15_CA_15_CB_15_HB3 | 3.5             | 5.08            |
| LYS-15        | 15_HA_15_CA_15_CB_15_2HB | 11.0            | 9.17            |
| ILE-18        | 18_HA_18_CA_18_CB_18_HB  | 10.5            | 10.00           |
| ILE-19        | 19_HA_19_CA_19_CB_19_HB  | 11.0            | 10.01           |
| ARG-20        | 20_HA_20_CA_20_CB_20_HB3 | 2.5             | 2.93            |
| ARG-20        | 20_HA_20_CA_20_CB_20_2HB | 12.5            | 10.83           |
| PHE-22        | 22_HA_22_CA_22_CB_22_HB3 | 3.5             | 2.63            |
| PHE-22        | 22_HA_22_CA_22_CB_22_2HB | 4.4             | 5.74            |
| TYR-23        | 23_HA_23_CA_23_CB_23_HB3 | 12.5            | 10.77           |
| TYR-23        | 23_HA_23_CA_23_CB_23_2HB | 3.8             | 4.20            |
| ASN-24        | 24_HA_24_CA_24_CB_24_HB3 | 12.0            | 8.17            |
| ASN-24        | 24_HA_24_CA_24_CB_24_2HB | 3.5             | 4.41            |
| CYS-30        | 30_HA_30_CA_30_CB_30_2HB | 12.0            | 10.03           |
| CYS-30        | 30_HA_30_CA_30_CB_30_HB3 | 2.5             | 2.22            |
| GLN-31        | 31_HA_31_CA_31_CB_31_HB3 | 3.5             | 3.58            |
| GLN-31        | 31_HA_31_CA_31_CB_31_2HB | 11.0            | 10.44           |
| THR-32        | 32_HA_32_CA_32_CB_32_HB  | 2.5             | 5.70            |
| PHE-33        | 33_HA_33_CA_33_CB_33_HB3 | 3.0             | 2.59            |
| PHE-33        | 33_HA_33_CA_33_CB_33_2HB | 4.5             | 5.98            |
| VAL-34        | 34_HA_34_CA_34_CB_34_HB  | 10.5            | 9.95            |
| TYR-35        | 35_HA_35_CA_35_CB_35_HB3 | 11.5            | 10.50           |
| TYR-35        | 35_HA_35_CA_35_CB_35_2HB | 6.5             | 2.87            |
| CYS-38        | 38_HA_38_CA_38_CB_38_2HB | 6.5             | 3.60            |
| CYS-38        | 38_HA_38_CA_38_CB_38_HB3 | 1.5             | 2.83            |
| LYS-41        | 41_HA_41_CA_41_CB_41_HB3 | 2.5             | 3.46            |
| LYS-41        | 41_HA_41_CA_41_CB_41_2HB | 12.5            | 10.67           |
| ASN-43        | 43_HA_43_CA_43_CB_43_2HB | 3.0             | 2.81            |
| ASN-43        | 43_HA_43_CA_43_CB_43_HB3 | 12.0            | 10.53           |
| ASN-44        | 44_HA_44_CA_44_CB_44_2HB | 4.0             | 4.19            |
| ASN-44        | 44_HA_44_CA_44_CB_44_HB3 | 11.0            | 10.42           |
| PHE-45        | 45_HA_45_CA_45_CB_45_HB3 | 4.0             | 4.21            |

---

|        |                          |      |       |
|--------|--------------------------|------|-------|
| PHE-45 | 45_HA_45_CA_45_CB_45_2HB | 11.8 | 10.55 |
| LYS-46 | 46_HA_46_CA_46_CB_46_HB3 | 4.0  | 6.55  |
| LYS-46 | 46_HA_46_CA_46_CB_46_2HB | 9.5  | 6.72  |
| SER-47 | 47_HA_47_CA_47_CB_47_2HB | 3.0  | 8.41  |
| SER-47 | 47_HA_47_CA_47_CB_47_HB3 | 2.8  | 2.90  |
| CYS-51 | 51_HA_51_CA_51_CB_51_HB3 | 11.5 | 10.07 |
| CYS-51 | 51_HA_51_CA_51_CB_51_2HB | 5.5  | 2.81  |
| MET-52 | 52_HA_52_CA_52_CB_52_2HB | 3.0  | 5.01  |
| MET-52 | 52_HA_52_CA_52_CB_52_HB3 | 10.2 | 8.70  |
| THR-54 | 54_HA_54_CA_54_CB_54_HB  | 10.0 | 9.18  |
| CYS-55 | 55_HA_55_CA_55_CB_55_2HB | 11.0 | 10.14 |
| CYS-55 | 55_HA_55_CA_55_CB_55_HB3 | 1.5  | 2.55  |

---



Table S4. HA-CA-CB-HB  $J$ -coupling data for GB3 domain.

| Residue index | Dihedral angle | $J$ -expt. | $J$ -calc. |
|---------------|----------------|------------|------------|
| TYR-3         | HA_CA_CB_HB2   | 11.8       | 10.75      |
| TYR-3         | HA_CA_CB_HB3   | 1.9        | 3.33       |
| ASN-8         | HA_CA_CB_HB2   | 6.0        | 3.03       |
| ASN-8         | HA_CA_CB_HB3   | 7.0        | 10.63      |
| ASP-22        | HA_CA_CB_HB2   | 4.0        | 5.12       |
| ASP-22        | HA_CA_CB_HB3   | 2.1        | 4.70       |
| PHE-30        | HA_CA_CB_HB2   | 11.3       | 10.47      |
| PHE-30        | HA_CA_CB_HB3   | 0.8        | 4.12       |
| ASN-35        | HA_CA_CB_HB2   | 7.9        | 3.43       |
| ASN-35        | HA_CA_CB_HB3   | 7.2        | 10.74      |
| ASN-37        | HA_CA_CB_HB2   | 12.3       | 10.73      |
| ASN-37        | HA_CA_CB_HB3   | 1.9        | 3.16       |
| ASP-40        | HA_CA_CB_HB2   | 3.6        | 3.72       |
| ASP-40        | HA_CA_CB_HB3   | 10.2       | 10.59      |
| TRP-43        | HA_CA_CB_HB2   | 11.1       | 8.60       |
| TRP-43        | HA_CA_CB_HB3   | 1.8        | 3.95       |
| TYR-45        | HA_CA_CB_HB2   | 4.4        | 3.61       |
| TYR-45        | HA_CA_CB_HB3   | 11.2       | 10.75      |
| ASP-46        | HA_CA_CB_HB2   | 3.4        | 4.61       |
| ASP-46        | HA_CA_CB_HB3   | 11.8       | 8.43       |
| ASP-47        | HA_CA_CB_HB2   | 3.6        | 4.05       |
| ASP-47        | HA_CA_CB_HB3   | 11.1       | 10.28      |

Table S5. N/C'-CA-CB-CG  $J$ -coupling data for GB3 domain.

| Residue index | Dihedral angle | $J$ -expt. | $J$ -calc. |
|---------------|----------------|------------|------------|
| VAL-6         | VAL_NCG2       | 0.5        | 0.90       |
| VAL-6         | VAL_CCG1       | 0.7        | 0.57       |
| VAL-6         | VAL_NCG1       | 2.0        | 2.08       |
| VAL-6         | VAL_CCG2       | 3.7        | 4.05       |
| ILE-7         | ILE_CCG2       | 0.6        | 3.91       |
| ILE-7         | ILE_NCG2       | 2.0        | 1.25       |
| THR-11        | THR_NCG2       | 0.9        | 1.53       |
| THR-11        | THR_CCG2       | 2.1        | 0.22       |
| THR-16        | THR_NCG2       | 0.2        | 1.54       |
| THR-16        | THR_CCG2       | 1.8        | 0.28       |
| THR-17        | THR_NCG2       | 0.6        | 0.67       |
| THR-17        | THR_CCG2       | 2.8        | 3.39       |
| THR-18        | THR_NCG2       | 0.0        | 1.58       |
| THR-18        | THR_CCG2       | 1.7        | 0.25       |
| VAL-21        | VAL_NCG1       | 0.7        | 0.50       |
| VAL-21        | VAL_NCG2       | 1.1        | 0.94       |
| VAL-21        | VAL_CCG2       | 1.1        | 1.25       |
| VAL-21        | VAL_CCG1       | 2.5        | 3.37       |
| THR-25        | THR_NCG2       | 1.7        | 1.57       |
| THR-25        | THR_CCG2       | 2.6        | 0.25       |
| VAL-39        | VAL_NCG2       | 0.6        | 0.97       |
| VAL-39        | VAL_CCG1       | 0.9        | 0.61       |
| VAL-39        | VAL_NCG1       | 1.9        | 2.06       |
| VAL-39        | VAL_CCG2       | 3.3        | 4.04       |
| VAL-42        | VAL_NCG2       | 0.7        | 0.73       |
| VAL-42        | VAL_CCG1       | 1.3        | 0.95       |
| VAL-42        | VAL_NCG1       | 1.7        | 2.01       |
| VAL-42        | VAL_CCG2       | 3.0        | 4.05       |
| THR-44        | THR_NCG2       | 0.5        | 1.52       |
| THR-44        | THR_CCG2       | 2.9        | 0.81       |
| THR-49        | THR_NCG2       | 0.8        | 1.37       |
| THR-49        | THR_CCG2       | 3.0        | 1.22       |
| THR-51        | THR_CCG2       | 0.5        | 0.22       |
| THR-51        | THR_NCG2       | 1.6        | 1.57       |
| THR-53        | THR_CCG2       | 0.4        | 0.22       |
| THR-53        | THR_NCG2       | 1.6        | 1.56       |
| VAL-54        | VAL_CCG1       | 0.7        | 0.79       |

|        |          |     |      |
|--------|----------|-----|------|
| VAL-54 | VAL_NCG1 | 0.9 | 0.93 |
| VAL-54 | VAL_CCG2 | 1.0 | 1.72 |
| VAL-54 | VAL_NCG2 | 1.8 | 1.51 |
| THR-55 | THR_CCG2 | 0.0 | 0.24 |
| THR-55 | THR_NCG2 | 1.5 | 1.51 |

---

Table S6. HA-CA-CB-HB *J*-Coupling data (Hz) for ubiquitin.

| Residue index | Dihedral angel           | <i>J</i> -expt. | <i>J</i> -calc. |
|---------------|--------------------------|-----------------|-----------------|
| MET-1         | 1_HA_1_CA_1_CB_1_1HB     | 4.3             | 3.54            |
| ILE-3         | 3_HA_3_CA_3_CB_3_HB      | 4.7             | 4.80            |
| PHE-4         | 4_HA_4_CA_4_CB_4_1HB     | 11.9            | 10.33           |
| PHE-5         | 4_HA_4_CA_4_CB_4_2HB     | 3.6             | 4.04            |
| VAL-5         | 5_HA_5_CA_5_CB_5_HB      | 9.6             | 10.47           |
| LYS-6         | 6_HA_6_CA_6_CB_6_1HB     | 6.2             | 4.75            |
| LYS-6         | 6_HA_6_CA_6_CB_6_2HB     | 7.0             | 8.69            |
| LEU-8         | 8_HA_8_CA_8_CB_8_1HB     | 8.7             | 10.02           |
| LEU-8         | 8_HA_8_CA_8_CB_8_2HB     | 4.1             | 3.31            |
| LYS-11        | 11_HA_11_CA_11_CB_11_1HB | 5.7             | 2.90            |
| LYS-11        | 11_HA_11_CA_11_CB_11_2HB | 6.7             | 10.52           |
| ILE-13        | 13_HA_13_CA_13_CB_13_HB  | 7.7             | 10.31           |
| LEU-15        | 15_HA_15_CA_15_CB_15_1HB | 8.4             | 8.32            |
| LEU-15        | 15_HA_15_CA_15_CB_15_2HB | 1.4             | 4.92            |
| GLU-16        | 16_HA_16_CA_16_CB_16_1HB | 5.5             | 5.05            |
| GLU-16        | 16_HA_16_CA_16_CB_16_2HB | 8.2             | 6.41            |
| VAL-17        | 17_HA_17_CA_17_CB_17_HB  | 2.7             | 8.78            |
| GLU-18        | 18_HA_18_CA_18_CB_18_1HB | 9.3             | 10.48           |
| GLU-18        | 18_HA_18_CA_18_CB_18_2HB | 2.5             | 2.57            |
| PRO-19        | 19_HA_19_CA_19_CB_19_1HB | 6.8             | 5.45            |
| PRO-19        | 19_HA_19_CA_19_CB_19_2HB | 7.3             | 9.66            |
| SER-20        | 20_HA_20_CA_20_CB_20_1HB | 9.4             | 9.61            |
| SER-20        | 20_HA_20_CA_20_CB_20_2HB | 3.0             | 3.39            |
| ILE-23        | 23_HA_23_CA_23_CB_23_HB  | 10.2            | 10.45           |
| ASN-25        | 25_HA_25_CA_25_CB_25_1HB | 8.4             | 9.69            |
| ASN-25        | 25_HA_25_CA_25_CB_25_2HB | 5.3             | 4.66            |
| VAL-26        | 26_HA_26_CA_26_CB_26_HB  | 9.9             | 10.60           |
| LYS-27        | 27_HA_27_CA_27_CB_27_1HB | 10.6            | 10.28           |
| LYS-27        | 27_HA_27_CA_27_CB_27_2HB | 2.4             | 3.18            |
| LYS-29        | 29_HA_29_CA_29_CB_29_1HB | 9.2             | 10.47           |
| LYS-29        | 29_HA_29_CA_29_CB_29_2HB | 1.9             | 3.49            |
| ILE-30        | 30_HA_30_CA_30_CB_30_HB  | 10.5            | 10.57           |
| GLN-31        | 31_HA_31_CA_31_CB_31_1HB | 3.8             | 2.60            |
| GLN-31        | 31_HA_31_CA_31_CB_31_2HB | 11.3            | 10.44           |
| ASP-32        | 32_HA_32_CA_32_CB_32_1HB | 7.4             | 8.32            |
| ASP-32        | 32_HA_32_CA_32_CB_32_2HB | 5.3             | 5.66            |
| LYS-33        | 33_HA_33_CA_33_CB_33_1HB | 9.0             | 7.61            |
| LYS-33        | 33_HA_33_CA_33_CB_33_2HB | 4.0             | 4.04            |

---

|        |                          |      |       |
|--------|--------------------------|------|-------|
| GLU-34 | 34_HA_34_CA_34_CB_34_1HB | 10.2 | 10.66 |
| GLU-34 | 34_HA_34_CA_34_CB_34_2HB | 4.4  | 3.01  |
| ILE-36 | 36_HA_36_CA_36_CB_36_HB  | 8.8  | 10.52 |
| PRO-37 | 37_HA_37_CA_37_CB_37_1HB | 6.5  | 5.50  |
| PRO-37 | 37_HA_37_CA_37_CB_37_2HB | 7.0  | 8.57  |
| PRO-38 | 38_HA_38_CA_38_CB_38_1HB | 7.8  | 9.72  |
| PRO-38 | 38_HA_38_CA_38_CB_38_2HB | 5.4  | 5.19  |
| ASP-39 | 39_HA_39_CA_39_CB_39_1HB | 4.7  | 8.31  |
| ASP-39 | 39_HA_39_CA_39_CB_39_2HB | 4.4  | 5.13  |
| GLN-40 | 40_HA_40_CA_40_CB_40_1HB | 12.2 | 8.50  |
| GLN-40 | 40_HA_40_CA_40_CB_40_2HB | 2.0  | 4.64  |
| ARG-42 | 42_HA_42_CA_42_CB_42_1HB | 8.3  | 7.30  |
| ARG-42 | 42_HA_42_CA_42_CB_42_2HB | 4.3  | 5.26  |
| LEU-43 | 43_HA_43_CA_43_CB_43_1HB | 9.9  | 10.28 |
| LEU-43 | 43_HA_43_CA_43_CB_43_2HB | 1.5  | 2.86  |
| ILE-44 | 44_HA_44_CA_44_CB_44_HB  | 8.0  | 10.24 |
| PHE-45 | 45_HA_45_CA_45_CB_45_1HB | 3.5  | 3.60  |
| PHE-45 | 45_HA_45_CA_45_CB_45_2HB | 9.8  | 10.54 |
| LEU-50 | 50_HA_50_CA_50_CB_50_1HB | 11.4 | 10.33 |
| LEU-50 | 50_HA_50_CA_50_CB_50_2HB | 3.9  | 3.88  |
| GLU-51 | 51_HA_51_CA_51_CB_51_1HB | 9.2  | 6.54  |
| GLU-51 | 51_HA_51_CA_51_CB_51_2HB | 3.2  | 6.59  |
| ASP-52 | 52_HA_52_CA_52_CB_52_1HB | 10   | 10.52 |
| ASP-52 | 52_HA_52_CA_52_CB_52_2HB | 1.3  | 3.33  |
| ARG-54 | 54_HA_54_CA_54_CB_54_1HB | 11.3 | 10.59 |
| ARG-54 | 54_HA_54_CA_54_CB_54_2HB | 1.4  | 2.92  |
| THR-55 | 55_HA_55_CA_55_CB_55_HB  | 2.4  | 3.94  |
| LEU-56 | 56_HA_56_CA_56_CB_56_1HB | 9.9  | 10.32 |
| LEU-56 | 56_HA_56_CA_56_CB_56_2HB | 2.1  | 2.52  |
| ASP-58 | 58_HA_58_CA_58_CB_58_1HB | 11.4 | 10.53 |
| ASP-58 | 58_HA_58_CA_58_CB_58_2HB | 2.4  | 3.47  |
| TYR-59 | 59_HA_59_CA_59_CB_59_1HB | 10   | 10.62 |
| TYR-59 | 59_HA_59_CA_59_CB_59_2HB | 1.8  | 3.39  |
| ASN-60 | 60_HA_60_CA_60_CB_60_1HB | 6.7  | 8.02  |
| ASN-60 | 60_HA_60_CA_60_CB_60_2HB | 5.5  | 6.03  |
| ILE-61 | 61_HA_61_CA_61_CB_61_HB  | 9.8  | 10.57 |
| GLN-62 | 62_HA_62_CA_62_CB_62_1HB | 11.1 | 10.10 |
| GLN-62 | 62_HA_62_CA_62_CB_62_2HB | 3.1  | 3.64  |
| LYS-63 | 63_HA_63_CA_63_CB_63_1HB | 3.5  | 4.06  |
| LYS-63 | 63_HA_63_CA_63_CB_63_2HB | 4.4  | 4.56  |
| GLU-64 | 64_HA_64_CA_64_CB_64_1HB | 9.9  | 10.06 |
| GLU-64 | 64_HA_64_CA_64_CB_64_2HB | 1.5  | 2.57  |
| SER-65 | 65_HA_65_CA_65_CB_65_1HB | 8.9  | 10.44 |

---

---

|        |                          |      |       |
|--------|--------------------------|------|-------|
| SER-65 | 65_HA_65_CA_65_CB_65_2HB | 4.2  | 3.00  |
| THR-66 | 66_HA_66_CA_66_CB_66_HB  | 10.6 | 10.61 |
| HIE-68 | 68_HA_68_CA_68_CB_68_1HB | 10.1 | 10.44 |
| HIE-68 | 68_HA_68_CA_68_CB_68_2HB | 2.0  | 3.00  |
| LEU-69 | 69_HA_69_CA_69_CB_69_1HB | 4.7  | 3.12  |
| LEU-69 | 69_HA_69_CA_69_CB_69_2HB | 9.5  | 10.26 |
| VAL-70 | 70_HA_70_CA_70_CB_70_HB  | 7.3  | 10.37 |
| ARG-72 | 72_HA_72_CA_72_CB_72_1HB | 6.4  | 3.12  |
| ARG-72 | 72_HA_72_CA_72_CB_72_2HB | 6.6  | 10.01 |
| LEU-73 | 73_HA_73_CA_73_CB_73_1HB | 8.6  | 10.35 |
| LEU-73 | 73_HA_73_CA_73_CB_73_2HB | 4.5  | 3.02  |

---

Table S7. N/C-CA-CB-CG J-Coupling data (Hz) for ubiquitin.

| Residue index | Dihedral angle | <i>J</i> -expt. | <i>J</i> -calc. |
|---------------|----------------|-----------------|-----------------|
| 3_ILE         | ILE_CCG2       | 3.7             | 4.06            |
| 3_ILE         | ILE_NCG2       | 0.4             | 0.57            |
| 5_VAL         | VAL_CCG1       | 0.0             | 0.57            |
| 5_VAL         | VAL_CCG2       | 3.7             | 3.53            |
| 5_VAL         | VAL_NCG1       | 1.8             | 2.04            |
| 5_VAL         | VAL_NCG2       | 0.5             | 0.99            |
| 7_THR         | THR_CCG2       | 2.7             | 0.58            |
| 7_THR         | THR_NCG2       | 1.1             | 1.09            |
| 9_THR         | THR_CCG2       | 3.0             | 1.28            |
| 9_THR         | THR_NCG2       | 0.8             | 0.98            |
| 12_THR        | THR_CCG2       | 0.4             | 0.21            |
| 12_THR        | THR_NCG2       | 1.6             | 1.55            |
| 13_ILE        | ILE_CCG2       | 1.7             | 0.42            |
| 13_ILE        | ILE_NCG2       | 1.4             | 1.38            |
| 14_THR        | THR_CCG2       | 0.8             | 2.46            |
| 14_THR        | THR_NCG2       | 1.5             | 0.80            |
| 17_VAL        | VAL_CCG1       | 3.9             | 3.36            |
| 17_VAL        | VAL_CCG2       | 1.0             | 1.00            |
| 17_VAL        | VAL_NCG1       | 0.2             | 1.72            |
| 17_VAL        | VAL_NCG2       | 0.7             | 1.09            |
| 22_THR        | THR_CCG2       | 3.4             | 3.34            |
| 22_THR        | THR_NCG2       | 0.8             | 0.82            |
| 23_ILE        | ILE_CCG2       | 0.9             | 0.46            |
| 23_ILE        | ILE_NCG2       | 2.1             | 3.97            |
| 26_VAL        | VAL_CCG1       | 0.8             | 0.79            |
| 26_VAL        | VAL_CCG2       | 4.2             | 3.55            |
| 26_VAL        | VAL_NCG1       | 2.2             | 2.09            |
| 26_VAL        | VAL_NCG2       | 0.6             | 0.83            |
| 30_ILE        | ILE_CCG2       | 1.0             | 1.06            |
| 30_ILE        | ILE_NCG2       | 2.1             | 1.68            |
| 36_ILE        | ILE_CCG2       | 0.7             | 3.96            |
| 36_ILE        | ILE_NCG2       | 2.1             | 1.10            |
| 44_ILE        | ILE_CCG2       | 0.8             | 0.45            |
| 44_ILE        | ILE_NCG2       | 1.6             | 1.48            |
| 55_THR        | THR_CCG2       | 3.0             | 3.20            |
| 55_THR        | THR_NCG2       | 0.8             | 1.00            |
| 61_ILE        | ILE_CCG2       | 1.0             | 0.55            |
| 61_ILE        | ILE_NCG2       | 2.1             | 1.08            |

|        |          |     |      |
|--------|----------|-----|------|
| 70_VAL | VAL_CCG2 | 2.4 | 0.83 |
| 70_VAL | VAL_NCG2 | 0.5 | 0.78 |

---



Table S8. C-CA-CB-CG  $J$ -Coupling data (Hz) for Ubiquitin.

| Residue index | Dihedral angel          | $J$ -expt. | $J$ -calc. |
|---------------|-------------------------|------------|------------|
| 2_GLN         | 2_C_2_CA_2_CB_2_CG      | 2.4        | 0.80       |
| 3_ILE         | 3_C_3_CA_3_CB_3_CG1     | 1.0        | 2.23       |
| 3_ILE         | 3_C_3_CA_3_CB_3_CG2     | 3.8        | 1.85       |
| 4_PHE         | 4_C_4_CA_4_CB_4_CG      | 4.0        | 3.56       |
| 5_VAL         | 5_C_5_CA_5_CB_5_CG2     | 3.5        | 3.53       |
| 6_LYS         | 6_C_6_CA_6_CB_6_CG      | 2.0        | 1.89       |
| 7_THR         | 7_C_7_CA_7_CB_7_CG2     | 2.5        | 0.58       |
| 8_LEU         | 8_C_8_CA_8_CB_8_CG      | 2.6        | 2.63       |
| 9_THR         | 9_C_9_CA_9_CB_9_CG2     | 2.8        | 1.28       |
| 13_ILE        | 13_C_13_CA_13_CB_13_CG1 | 2.3        | 3.37       |
| 13_ILE        | 13_C_13_CA_13_CB_13_CG2 | 1.5        | 0.46       |
| 14_THR        | 14_C_14_CA_14_CB_14_CG2 | 0.7        | 2.90       |
| 15_LEU        | 15_C_15_CA_15_CB_15_CG  | 2.2        | 2.79       |
| 16_GLU        | 16_C_16_CA_16_CB_16_CG  | 1.8        | 1.32       |
| 17_VAL        | 17_C_17_CA_17_CB_17_CG1 | 3.6        | 3.28       |
| 17_VAL        | 17_C_17_CA_17_CB_17_CG2 | 0.9        | 0.73       |
| 19_PRO        | 19_C_19_CA_19_CB_19_CG  | 2.2        | 3.40       |
| 21_ASP        | 21_C_21_CA_21_CB_21_CG  | 5.5        | 4.19       |
| 22_THR        | 22_C_22_CA_22_CB_22_CG2 | 3.1        | 0.39       |
| 24_GLU        | 24_C_24_CA_24_CB_24_CG  | 1.5        | 0.90       |
| 25_ASN        | 25_C_25_CA_25_CB_25_CG  | 3.4        | 1.87       |
| 26_VAL        | 26_C_26_CA_26_CB_26_CG1 | 0.8        | 0.79       |
| 26_VAL        | 26_C_26_CA_26_CB_26_CG2 | 4.0        | 3.55       |
| 29_LYS        | 29_C_29_CA_29_CB_29_CG  | 4.0        | 3.58       |
| 31_GLN        | 31_C_31_CA_31_CB_31_CG  | 0.6        | 0.56       |
| 32_ASP        | 32_C_32_CA_32_CB_32_CG  | 3.3        | 3.93       |
| 33_LYS        | 33_C_33_CA_33_CB_33_CG  | 2.8        | 1.16       |
| 34_GLU        | 34_C_34_CA_34_CB_34_CG  | 2.9        | 3.57       |
| 38_PRO        | 38_C_38_CA_38_CB_38_CG  | 2.7        | 3.27       |
| 39_ASP        | 39_C_39_CA_39_CB_39_CG  | 1.8        | 3.56       |
| 40_GLN        | 40_C_40_CA_40_CB_40_CG  | 3.4        | 0.87       |
| 41_GLN        | 41_C_41_CA_41_CB_41_CG  | 3.5        | 3.53       |
| 42_ARG        | 42_C_42_CA_42_CB_42_CG  | 2.4        | 3.02       |
| 43_LEU        | 43_C_43_CA_43_CB_43_CG  | 3.0        | 3.27       |
| 44_ILE        | 44_C_44_CA_44_CB_44_CG1 | 3.1        | 3.35       |
| 44_ILE        | 44_C_44_CA_44_CB_44_CG2 | 0.7        | 0.45       |
| 48_LYS        | 48_C_48_CA_48_CB_48_CG  | 2.5        | 2.55       |

|        |                         |     |      |
|--------|-------------------------|-----|------|
| 49_GLN | 49_C_49_CA_49_CB_49_CG  | 1.4 | 0.72 |
| 50_LEU | 50_C_50_CA_50_CB_50_CG  | 2.4 | 3.46 |
| 51_GLU | 51_C_51_CA_51_CB_51_CG  | 2.9 | 1.91 |
| 54_ARG | 54_C_54_CA_54_CB_54_CG  | 3.5 | 3.62 |
| 55_THR | 55_C_55_CA_55_CB_55_CG2 | 2.8 | 0.50 |
| 56_LEU | 56_C_56_CA_56_CB_56_CG  | 2.8 | 3.23 |
| 58_ASP | 58_C_58_CA_58_CB_58_CG  | 5.6 | 4.18 |
| 59_TYR | 59_C_59_CA_59_CB_59_CG  | 3.6 | 3.56 |
| 60_ASN | 60_C_60_CA_60_CB_60_CG  | 2.0 | 4.22 |
| 61_ILE | 61_C_61_CA_61_CB_61_CG1 | 3.3 | 2.98 |
| 61_ILE | 61_C_61_CA_61_CB_61_CG2 | 0.8 | 0.57 |
| 63_LYS | 63_C_63_CA_63_CB_63_CG  | 1.2 | 0.97 |
| 64_GLU | 64_C_64_CA_64_CB_64_CG  | 3.4 | 0.66 |
| 66_THR | 66_C_66_CA_66_CB_66_CG2 | 0.5 | 3.33 |
| 67_LEU | 67_C_67_CA_67_CB_67_CG  | 3.4 | 3.28 |
| 68_HIE | 68_C_68_CA_68_CB_68_CG  | 0.8 | 2.17 |
| 69_LEU | 69_C_69_CA_69_CB_69_CG  | 0.8 | 0.74 |
| 72_ARG | 72_C_72_CA_72_CB_72_CG  | 1.6 | 2.33 |
| 73_LEU | 73_C_73_CA_73_CB_73_CG  | 2.8 | 3.53 |
| 74_ARG | 74_C_74_CA_74_CB_74_CG  | 2.2 | 2.09 |

---

Table S9. HA-CA-CB-HB *J*-Coupling data (Hz) for hen egg white lysozyme.

| Residue index | Dihedral angle           | <i>J</i> -expt. | <i>J</i> -calc. |
|---------------|--------------------------|-----------------|-----------------|
| VAL-2         | 2_HA_2_CA_2_CB_2_HB      | 9.8             | 10.51           |
| PHE-3         | 3_HA_3_CA_3_CB_3_1HB     | 7.7             | 9.61            |
| PHE-3         | 3_HA_3_CA_3_CB_3_2HB     | 1.0             | 2.64            |
| CYS-6         | 6_HA_6_CA_6_CB_6_1HB     | 12.6            | 10.55           |
| CYS-6         | 6_HA_6_CA_6_CB_6_2HB     | 0.9             | 3.36            |
| LEU-8         | 8_HA_8_CA_8_CB_8_1HB     | 1.2             | 4.10            |
| MET-12        | 12_HA_12_CA_12_CB_12_1HB | 12.6            | 10.52           |
| MET-12        | 12_HA_12_CA_12_CB_12_2HB | 1.0             | 2.63            |
| HIE-15        | 15_HA_15_CA_15_CB_15_1HB | 9.0             | 10.54           |
| HIE-15        | 15_HA_15_CA_15_CB_15_2HB | 0.6             | 3.48            |
| LEU-17        | 17_HA_17_CA_17_CB_17_1HB | 9.5             | 9.94            |
| LEU-17        | 17_HA_17_CA_17_CB_17_2HB | 1.0             | 2.45            |
| ASP-18        | 18_HA_18_CA_18_CB_18_1HB | 1.7             | 2.62            |
| ASP-18        | 18_HA_18_CA_18_CB_18_2HB | 13.2            | 10.45           |
| TYR-20        | 20_HA_20_CA_20_CB_20_1HB | 1.4             | 3.03            |
| TYR-20        | 20_HA_20_CA_20_CB_20_2HB | 12              | 10.67           |
| TYR-23        | 23_HA_23_CA_23_CB_23_1HB | 8.3             | 10.65           |
| TYR-23        | 23_HA_23_CA_23_CB_23_2HB | 0.2             | 3.30            |
| SER-24        | 24_HA_24_CA_24_CB_24_1HB | 1.0             | 3.31            |
| ASN-27        | 27_HA_27_CA_27_CB_27_1HB | 12.1            | 10.66           |
| ASN-27        | 27_HA_27_CA_27_CB_27_2HB | 0.5             | 3.20            |
| CYS-30        | 30_HA_30_CA_30_CB_30_1HB | 0.2             | 2.59            |
| CYS-30        | 30_HA_30_CA_30_CB_30_2HB | 6.8             | 10.51           |
| LYS-33        | 33_HA_33_CA_33_CB_33_1HB | 2.1             | 3.22            |
| LYS-33        | 33_HA_33_CA_33_CB_33_2HB | 7.9             | 10.52           |
| PHE-34        | 34_HA_34_CA_34_CB_34_1HB | 12.1            | 10.63           |
| PHE-34        | 34_HA_34_CA_34_CB_34_2HB | 1.6             | 3.13            |
| PHE-38        | 38_HA_38_CA_38_CB_38_1HB | 11.9            | 10.26           |
| ASN-39        | 39_HA_39_CA_39_CB_39_1HB | 2.2             | 5.00            |
| ASN-39        | 39_HA_39_CA_39_CB_39_2HB | 12.7            | 8.60            |
| GLN-41        | 41_HA_41_CA_41_CB_41_1HB | 10              | 9.16            |
| GLN-41        | 41_HA_41_CA_41_CB_41_2HB | 1.2             | 4.48            |
| THR-43        | 43_HA_43_CA_43_CB_43_HB  | 3.9             | 10.07           |
| THR-47        | 47_HA_47_CA_47_CB_47_HB  | 2.4             | 10.57           |
| ASP-48        | 48_HA_48_CA_48_CB_48_1HB | 0.2             | 3.92            |
| ASP-48        | 48_HA_48_CA_48_CB_48_2HB | 1.2             | 8.53            |

|         |                              |      |       |
|---------|------------------------------|------|-------|
| THR-51  | 51_HA_51_CA_51_CB_51_HB      | 13.3 | 10.53 |
| ASP-52  | 52_HA_52_CA_52_CB_52_1HB     | 10.3 | 10.43 |
| ASP-52  | 52_HA_52_CA_52_CB_52_2HB     | 0.3  | 3.56  |
| TYR-53  | 53_HA_53_CA_53_CB_53_1HB     | 12.5 | 10.46 |
| TYR-53  | 53_HA_53_CA_53_CB_53_2HB     | 0.8  | 3.50  |
| ILE-55  | 55_HA_55_CA_55_CB_55_HB      | 3.6  | 2.93  |
| ASN-59  | 59_HA_59_CA_59_CB_59_1HB     | 1.9  | 5.62  |
| ASN-59  | 59_HA_59_CA_59_CB_59_2HB     | 8.1  | 4.66  |
| CYS-64  | 64_HA_64_CA_64_CB_64_1HB     | 0.9  | 4.00  |
| CYS-64  | 64_HA_64_CA_64_CB_64_2HB     | 0.5  | 3.45  |
| ASN-65  | 65_HA_65_CA_65_CB_65_1HB     | 2.1  | 6.37  |
| ASN-65  | 65_HA_65_CA_65_CB_65_2HB     | 13.4 | 6.41  |
| ASP-66  | 66_HA_66_CA_66_CB_66_1HB     | 0.1  | 3.60  |
| ASP-66  | 66_HA_66_CA_66_CB_66_2HB     | 2.2  | 3.92  |
| THR-69  | 69_HA_69_CA_69_CB_69_HB      | 11.4 | 10.56 |
| ASN-74  | 74_HA_74_CA_74_CB_74_1HB     | 1.7  | 4.49  |
| ASN-74  | 74_HA_74_CA_74_CB_74_2HB     | 12.6 | 5.51  |
| CYS-80  | 80_HA_80_CA_80_CB_80_1HB     | 13.8 | 10.25 |
| CYS-80  | 80_HA_80_CA_80_CB_80_2HB     | 1.0  | 4.11  |
| LEU-84  | 84_HA_84_CA_84_CB_84_1HB     | 12.0 | 10.13 |
| LEU-84  | 84_HA_84_CA_84_CB_84_2HB     | 0.5  | 3.34  |
| ASP-87  | 87_HA_87_CA_87_CB_87_2HB     | 12.2 | 9.88  |
| ILE-88  | 88_HA_88_CA_88_CB_88_HB      | 2.0  | 3.63  |
| THR-89  | 89_HA_89_CA_89_CB_89_HB      | 10.8 | 10.53 |
| ASN-93  | 93_HA_93_CA_93_CB_93_1HB     | 13.5 | 10.56 |
| ASN-93  | 93_HA_93_CA_93_CB_93_2HB     | 1.9  | 2.85  |
| CYS-94  | 94_HA_94_CA_94_CB_94_1HB     | 2.1  | 3.04  |
| CYS-94  | 94_HA_94_CA_94_CB_94_2HB     | 15.0 | 10.64 |
| ILE-98  | 98_HA_98_CA_98_CB_98_HB      | 15.3 | 10.32 |
| MET-105 | 105_HA_105_CA_105_CB_105_1HB | 13.0 | 6.79  |
| MET-105 | 105_HA_105_CA_105_CB_105_2HB | 2.6  | 6.26  |
| ASN-106 | 106_HA_106_CA_106_CB_106_1HB | 13.2 | 10.59 |
| ASN-106 | 106_HA_106_CA_106_CB_106_2HB | 3.1  | 3.07  |
| TRP-111 | 111_HA_111_CA_111_CB_111_1HB | 1.7  | 3.20  |
| ARG-114 | 114_HA_114_CA_114_CB_114_2HB | 1.8  | 4.05  |
| LYS-116 | 116_HA_116_CA_116_CB_116_1HB | 3.4  | 3.08  |
| LYS-116 | 116_HA_116_CA_116_CB_116_2HB | 9.8  | 10.54 |
| THR-118 | 118_HA_118_CA_118_CB_118_HB  | 4.9  | 3.14  |
| ASP-119 | 119_HA_119_CA_119_CB_119_1HB | 4.5  | 3.55  |
| ASP-119 | 119_HA_119_CA_119_CB_119_2HB | 13.3 | 10.48 |
| VAL-120 | 120_HA_120_CA_120_CB_120_HB  | 4.5  | 3.50  |
| TRP-123 | 123_HA_123_CA_123_CB_123_1HB | 8.6  | 10.44 |
| TRP-123 | 123_HA_123_CA_123_CB_123_2HB | 0.3  | 3.07  |

|         |                              |     |       |
|---------|------------------------------|-----|-------|
| ILE-124 | 124_HA_124_CA_124_CB_124_HB  | 4.2 | 10.06 |
| CYS-127 | 127_HA_127_CA_127_CB_127_2HB | 2.6 | 3.76  |

---

Table S9. C-CA-CB-HB *J*-Coupling data (Hz) for hen egg white lysozyme.

| Residue index | Dihedral angel          | <i>J</i> -expt. | <i>J</i> -calc. |
|---------------|-------------------------|-----------------|-----------------|
| 2_VAL         | 2_C_2_CA_2_CB_2_HB      | 2.6             | 1.46            |
| 3_PHE         | 3_C_3_CA_3_CB_3_1HB     | 1.4             | 1.52            |
| 3_PHE         | 3_C_3_CA_3_CB_3_2HB     | 3.6             | 2.74            |
| 6_CYS         | 6_C_6_CA_6_CB_6_1HB     | 3.7             | 1.65            |
| 6_CYS         | 6_C_6_CA_6_CB_6_2HB     | 2.6             | 1.25            |
| 8_LEU         | 8_C_8_CA_8_CB_8_1HB     | 8.5             | 5.94            |
| 8_LEU         | 8_C_8_CA_8_CB_8_2HB     | 3.1             | 1.79            |
| 12_MET        | 12_C_12_CA_12_CB_12_1HB | 1.8             | 1.37            |
| 12_MET        | 12_C_12_CA_12_CB_12_2HB | 2.2             | 2.45            |
| 15_HIE        | 15_C_15_CA_15_CB_15_1HB | 2.2             | 1.94            |
| 17_LEU        | 17_C_17_CA_17_CB_17_1HB | 1.8             | 1.44            |
| 17_LEU        | 17_C_17_CA_17_CB_17_2HB | 2.2             | 3.00            |
| 18_ASP        | 18_C_18_CA_18_CB_18_1HB | 8.3             | 6.66            |
| 20_TYR        | 20_C_20_CA_20_CB_20_1HB | 8.1             | 6.88            |
| 20_TYR        | 20_C_20_CA_20_CB_20_2HB | 4.4             | 1.74            |
| 23_TYR        | 23_C_23_CA_23_CB_23_1HB | 3.0             | 1.77            |
| 23_TYR        | 23_C_23_CA_23_CB_23_2HB | 2.6             | 1.69            |
| 24_SER        | 24_C_24_CA_24_CB_24_1HB | 1.3             | 1.41            |
| 24_SER        | 24_C_24_CA_24_CB_24_2HB | 7.4             | 1.13            |
| 27_ASN        | 27_C_27_CA_27_CB_27_1HB | 0.3             | 1.57            |
| 27_ASN        | 27_C_27_CA_27_CB_27_2HB | 1.1             | 1.97            |
| 30_CYS        | 30_C_30_CA_30_CB_30_1HB | 7.7             | 6.48            |
| 30_CYS        | 30_C_30_CA_30_CB_30_2HB | 2.3             | 1.43            |
| 33_LYS        | 33_C_33_CA_33_CB_33_1HB | 1.1             | 1.51            |
| 33_LYS        | 33_C_33_CA_33_CB_33_2HB | 12.5            | 6.85            |
| 34_PHE        | 34_C_34_CA_34_CB_34_1HB | 1.1             | 1.44            |
| 34_PHE        | 34_C_34_CA_34_CB_34_2HB | 2.2             | 2.15            |
| 38_PHE        | 38_C_38_CA_38_CB_38_1HB | 0.7             | 1.69            |
| 38_PHE        | 38_C_38_CA_38_CB_38_2HB | 3.0             | 1.90            |
| 39_ASN        | 39_C_39_CA_39_CB_39_1HB | 8.1             | 3.04            |
| 39_ASN        | 39_C_39_CA_39_CB_39_2HB | 2.2             | 1.92            |
| 40_THR        | 40_C_40_CA_40_CB_40_HB  | 0.4             | 1.14            |
| 41_GLN        | 41_C_41_CA_41_CB_41_1HB | 1.9             | 1.80            |
| 43_THR        | 43_C_43_CA_43_CB_43_HB  | 1.8             | 0.96            |
| 47_THR        | 47_C_47_CA_47_CB_47_HB  | 1.7             | 0.78            |
| 48_ASP        | 48_C_48_CA_48_CB_48_1HB | 0.7             | 1.87            |
| 48_ASP        | 48_C_48_CA_48_CB_48_2HB | 9.6             | 3.03            |
| 51_THR        | 51_C_51_CA_51_CB_51_HB  | 1.7             | 1.08            |

|         |                             |      |      |
|---------|-----------------------------|------|------|
| 52_ASP  | 52_C_52_CA_52_CB_52_2HB     | 1.1  | 1.71 |
| 53_TYR  | 53_C_53_CA_53_CB_53_1HB     | 2.6  | 1.74 |
| 53_TYR  | 53_C_53_CA_53_CB_53_2HB     | 1.9  | 1.86 |
| 55_ILE  | 55_C_55_CA_55_CB_55_HB      | 7.0  | 6.58 |
| 59_ASN  | 59_C_59_CA_59_CB_59_1HB     | 8.5  | 4.77 |
| 64_CYS  | 64_C_64_CA_64_CB_64_1HB     | 2.1  | 1.22 |
| 64_CYS  | 64_C_64_CA_64_CB_64_2HB     | 8.0  | 6.56 |
| 65_ASN  | 65_C_65_CA_65_CB_65_1HB     | 8.1  | 4.07 |
| 65_ASN  | 65_C_65_CA_65_CB_65_2HB     | 1.0  | 2.72 |
| 66_ASP  | 66_C_66_CA_66_CB_66_1HB     | 1.4  | 1.88 |
| 66_ASP  | 66_C_66_CA_66_CB_66_2HB     | 10.9 | 6.67 |
| 74_ASN  | 74_C_74_CA_74_CB_74_1HB     | 6.6  | 4.85 |
| 74_ASN  | 74_C_74_CA_74_CB_74_2HB     | 0.1  | 3.35 |
| 80_CYS  | 80_C_80_CA_80_CB_80_1HB     | 2.8  | 1.57 |
| 80_CYS  | 80_C_80_CA_80_CB_80_2HB     | 0.9  | 1.30 |
| 84_LEU  | 84_C_84_CA_84_CB_84_1HB     | 2.6  | 2.24 |
| 84_LEU  | 84_C_84_CA_84_CB_84_2HB     | 1.5  | 1.74 |
| 89_THR  | 89_C_89_CA_89_CB_89_HB      | 3.3  | 0.78 |
| 92_VAL  | 92_C_92_CA_92_CB_92_HB      | 1.3  | 1.58 |
| 94_CYS  | 94_C_94_CA_94_CB_94_1HB     | 9.8  | 6.56 |
| 94_CYS  | 94_C_94_CA_94_CB_94_2HB     | 3.1  | 1.19 |
| 98_ILE  | 98_C_98_CA_98_CB_98_HB      | 1.8  | 1.12 |
| 105_MET | 105_C_105_CA_105_CB_105_1HB | 1.1  | 2.14 |
| 105_MET | 105_C_105_CA_105_CB_105_2HB | 1.4  | 4.20 |
| 106_ASN | 106_C_106_CA_106_CB_106_1HB | 3.0  | 1.50 |
| 106_ASN | 106_C_106_CA_106_CB_106_2HB | 3.0  | 2.15 |
| 116_LYS | 116_C_116_CA_116_CB_116_1HB | 8.5  | 6.81 |
| 116_LYS | 116_C_116_CA_116_CB_116_2HB | 2.2  | 1.72 |
| 118_THR | 118_C_118_CA_118_CB_118_HB  | 1.8  | 1.16 |
| 120_VAL | 120_C_120_CA_120_CB_120_HB  | 3.0  | 1.64 |
| 123_TRP | 123_C_123_CA_123_CB_123_1HB | 1.1  | 1.50 |
| 123_TRP | 123_C_123_CA_123_CB_123_2HB | 1.8  | 2.23 |
| 124_ILE | 124_C_124_CA_124_CB_124_HB  | 0.8  | 1.47 |
| 127_CYS | 127_C_127_CA_127_CB_127_2HB | 0.8  | 1.28 |

---
